# Supplementary material for: Highly selective hydrogenolysis of lignin β-O-4 models by a coupled polyoxometalate/CdS photocatalytic system
Source: Royal Society of Chemistry journal article supplement (doi:10.1039/d3gc03468b), 2023-01-01
Supplement: d3gc03468b1.pdf [file d3gc03468b1.pdf]

## Supporting Information

### Highly Selective Hydrogenolysis of Lignin $\beta$ -O-4 Models by Coupled Polyoxometalates/CdS Photocatalytic System

Mo Zhang<sup>a,b,†</sup>, Zheng Li<sup>a,†</sup>, Yeqin Feng<sup>a</sup>, Xing Xin<sup>a</sup>, Guo-Yu Yang<sup>a\*</sup>, Hongjin Lv<sup>a\*</sup>

<sup>a</sup> MOE Key Laboratory of Cluster Science, Beijing Key Laboratory of Photoelectroic/Electrophotonic Conversion Materials, School of Chemistry and Chemical Engineering, Beijing Institute of Technology, Beijing 102488, P. R. China.

<sup>b</sup> School of Pharmacy, Key Laboratory of Innovative Drug Development and Evaluation, Hebei Medical University, Shijiazhuang 050017, P. R. China.

\*Corresponding author e-mail: [hlv@bit.edu.cn](mailto:hlv@bit.edu.cn); [ygy@bit.edu.cn](mailto:ygy@bit.edu.cn)

†These authors contributed equally to this work.

## Table of Contents

|                                                                                                                                                             |     |
|-------------------------------------------------------------------------------------------------------------------------------------------------------------|-----|
| <b>Fig. S1</b> TEM images of the CdS QDs                                                                                                                    | S3  |
| <b>Fig. S2</b> Digital photos of the reaction solution using different capping agent QDs                                                                    | S3  |
| <b>Fig. S3</b> UV-vis spectra of CdS QDs with different capping agents                                                                                      | S4  |
| <b>Fig. S4</b> XPS spectra of CdS QDs                                                                                                                       | S5  |
| <b>Fig. S5</b> Polyhedral and ball-and-stick representations of polyoxometalates: <b>Ni<sub>4</sub>P<sub>2</sub></b> and <b>Ni<sub>9</sub>P<sub>3</sub></b> | S6  |
| <b>Fig. S6</b> FT-IR spectra of <b>Ni<sub>4</sub>P<sub>2</sub></b> and <b>Ni<sub>9</sub>P<sub>3</sub></b>                                                   | S6  |
| <b>Fig. S7</b> UV-vis spectra of <b>Ni<sub>9</sub>P<sub>3</sub></b> and <b>Ni<sub>4</sub>P<sub>2</sub></b> catalyst with the same concentration             | S7  |
| <b>Fig. S8</b> Digital photos of the reaction solution before and after photocatalysis                                                                      | S7  |
| <b>Fig. S9</b> SEM and corresponding elemental mapping images of isolated CdS-MPA QDs                                                                       | S8  |
| <b>Fig. S10</b> High resolution XPS spectra of isolated CdS-MPA QDs from NiCl <sub>2</sub> -catalyzed                                                       | S8  |
| <b>Fig. S11</b> UV-vis spectra of CdS-MPA QDs before and after photocatalysis                                                                               | S9  |
| <b>Fig. S12</b> Photocatalytic hydrogenolysis of PP-one                                                                                                     | S9  |
| <b>Fig. S13</b> Gas chromatography (GC) from the photocatalytic hydrogenolysis of PP-one                                                                    | S10 |
| <b>Fig. S14</b> Energy level diagram and cyclic voltammogram                                                                                                | S10 |
| <b>Fig. S15</b> Gas chromatography (GC) trace of hydrogen gas                                                                                               | S11 |
| <b>Table S1</b> Semiconductor photocatalysts for lignin conversion                                                                                          | S12 |
| <b>Table S2</b> Screening of reaction conditions for photocatalytic hydrogenolysis of PP-one                                                                | S13 |
| <b>Fig. S16</b> <sup>1</sup> H NMR and <sup>13</sup> C NMR spectra of compound <b>1a</b>                                                                    | S14 |
| <b>Fig. S17</b> <sup>1</sup> H NMR and <sup>13</sup> C NMR spectra of compound <b>2a</b>                                                                    | S15 |
| <b>Fig. S18</b> <sup>1</sup> H NMR and <sup>13</sup> C NMR spectra of compound <b>3a</b>                                                                    | S16 |
| <b>Fig. S19</b> <sup>1</sup> H NMR and <sup>13</sup> C NMR spectra of compound <b>4a</b>                                                                    | S17 |
| <b>Fig. S20</b> <sup>1</sup> H NMR and <sup>13</sup> C NMR spectra of compound <b>5a</b>                                                                    | S18 |
| <b>Fig. S21</b> <sup>1</sup> H NMR and <sup>13</sup> C NMR spectra of compound <b>6a</b>                                                                    | S19 |
| <b>Fig. S22</b> The structure and GC-MS spectra of compound <b>7a</b>                                                                                       | S20 |

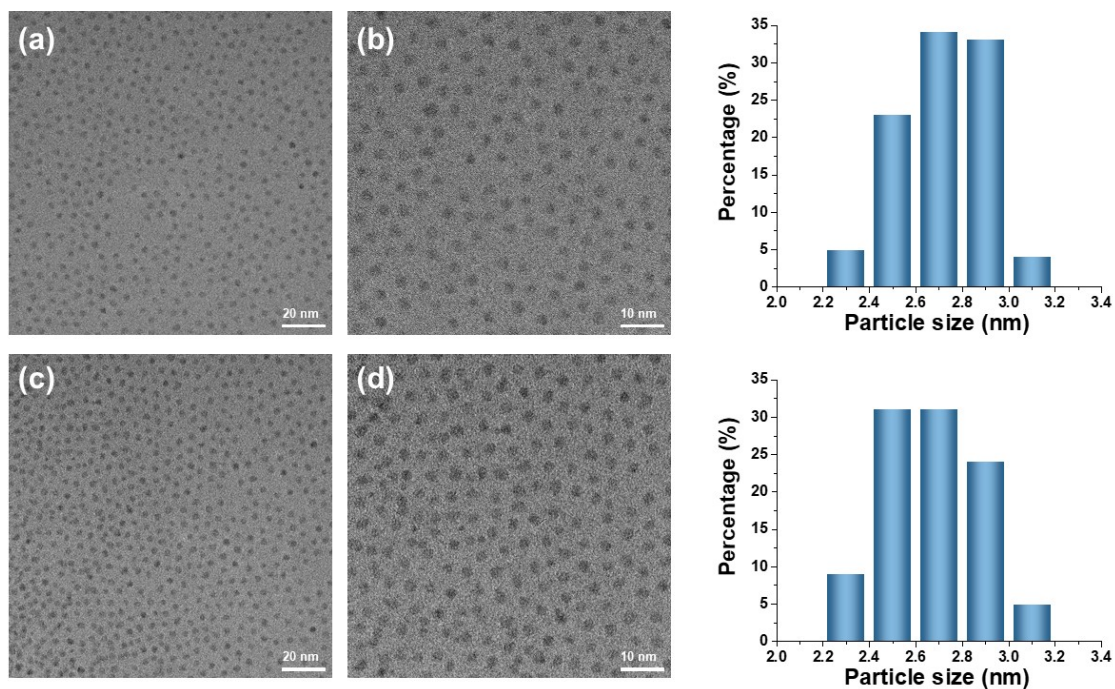

**Fig. S1** TEM images (scale bars: (a) 20 nm and (b) 10 nm, respectively) of CdS-OA QDs, the average length was calculated to be 2.73 nm; (scale bars: (c) 20 nm and (d) 10 nm, respectively) of CdS-MPA QDs, the average length was calculated to be 2.66 nm. It was noticed that ligand exchange does almost not affect the size of CdS QDs

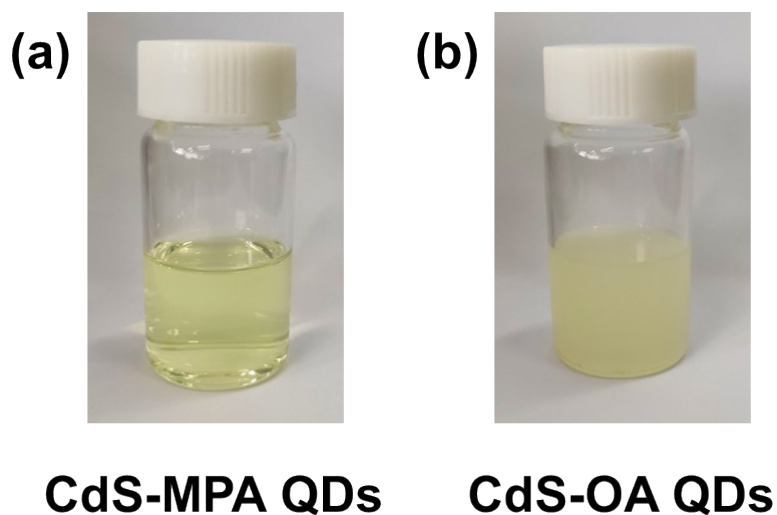

**Fig. S2** Digital photos of the reaction solution using different capping agent QDs: (a) CdS-MPA QDs and (b) CdS-OA QDs

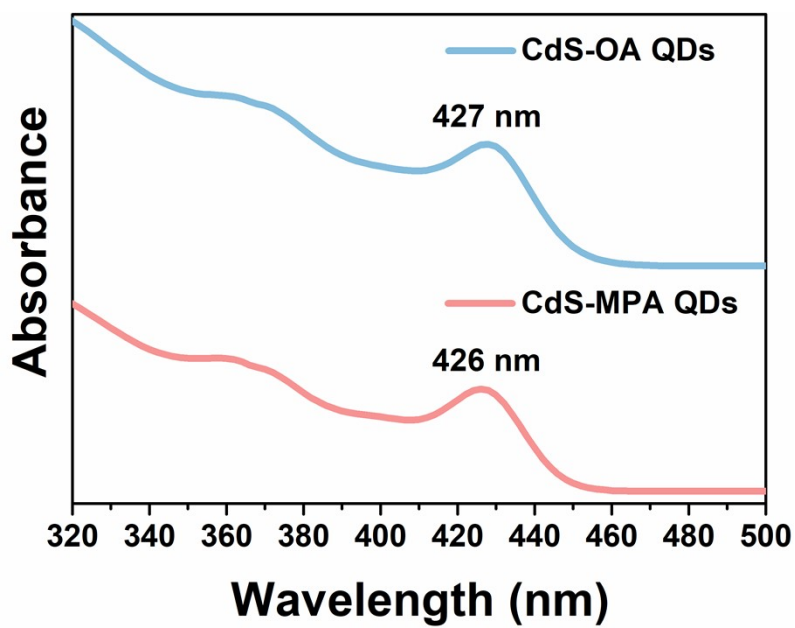

**Fig. S3** UV-vis spectra of CdS QDs with different capping agents. Note: the spectrum of OA-CdS was measured in hexane, while the spectra of MPA-CdS samples were measured in water

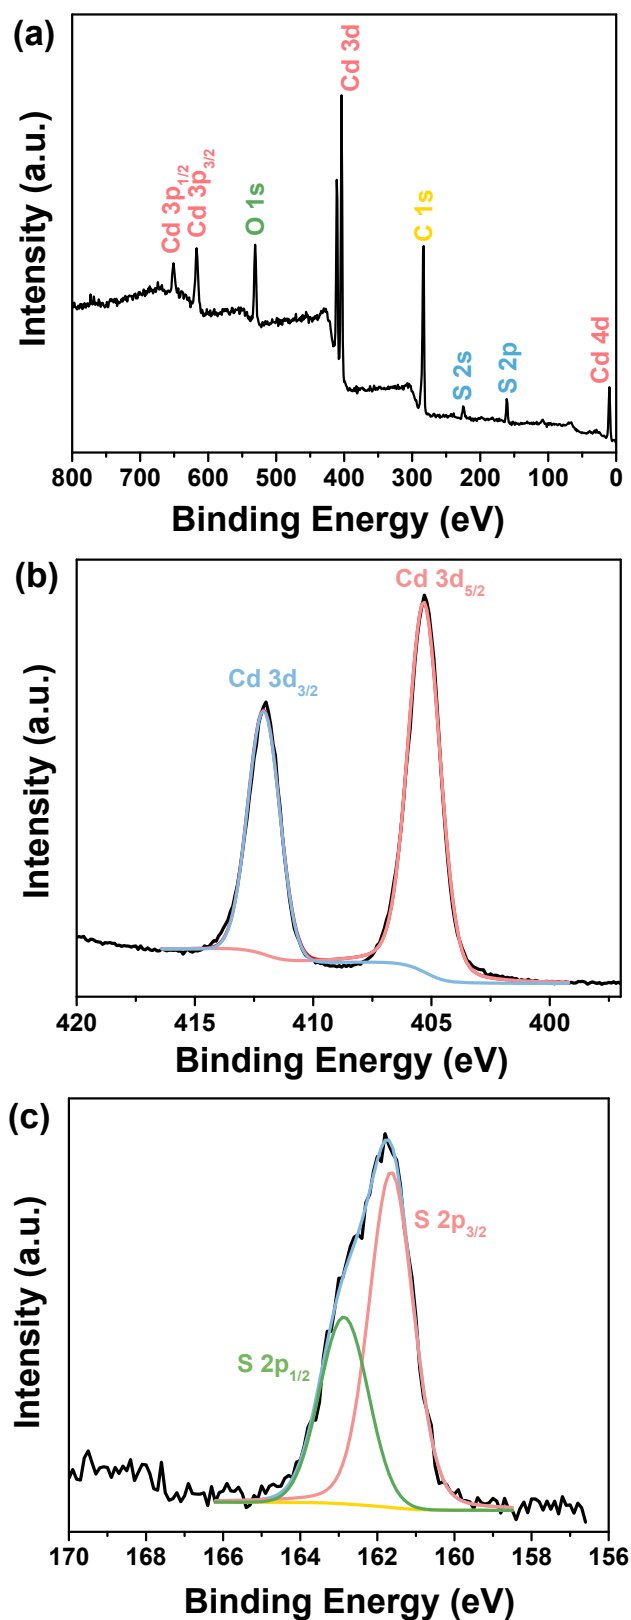

**Fig. S4** (a) The survey XPS spectra of CdS-MPA QDs, and corresponding high resolution XPS signals of (b) Cd 3d, (c) S 2p

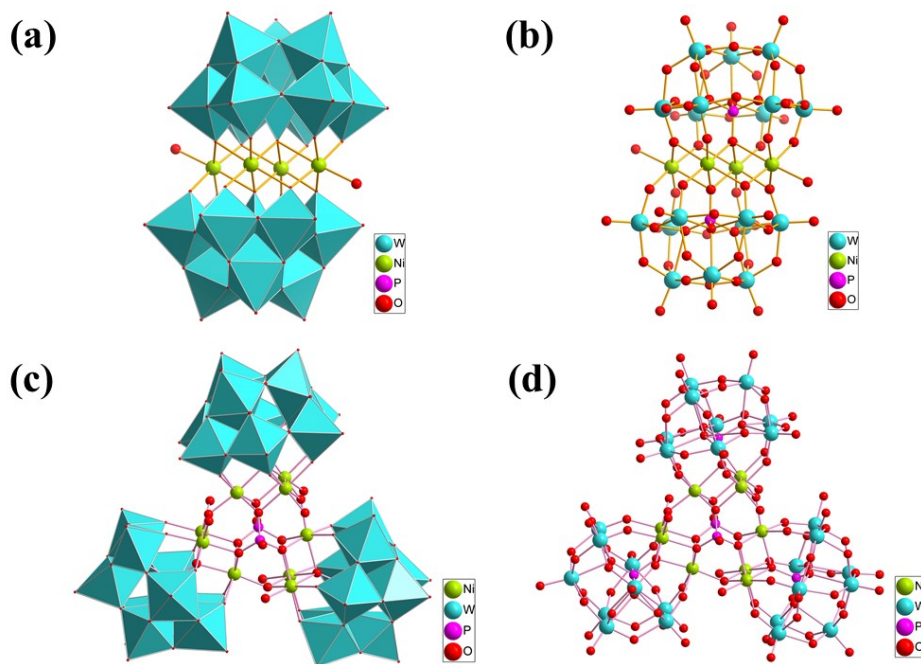

**Fig. S5** Polyhedral and ball-and-stick representations of two polyoxometalates: (a-b)  $\text{Ni}_4\text{P}_2$  and (c-d)  $\text{Ni}_9\text{P}_3$

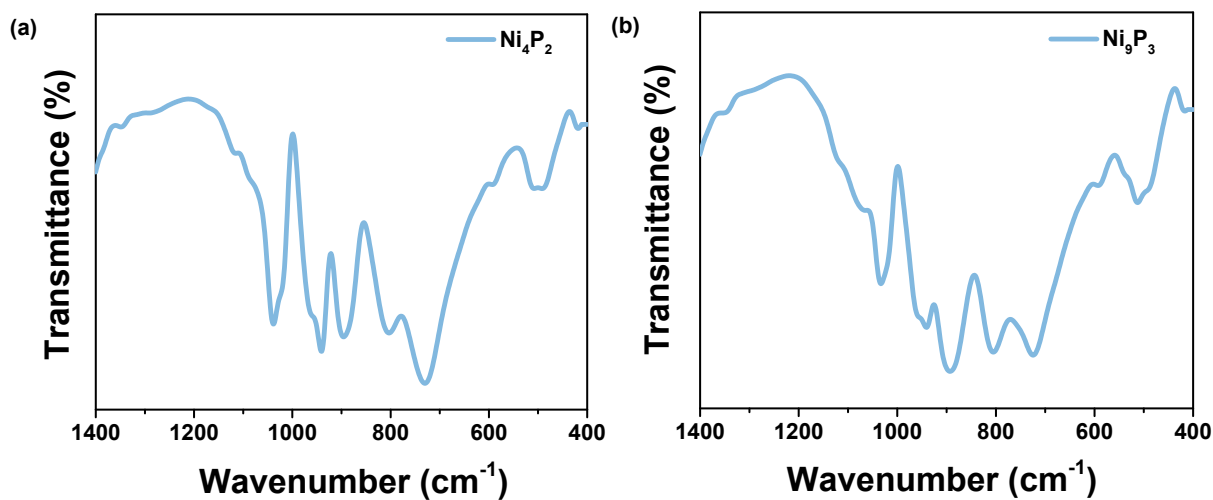

**Fig. S6** FT-IR spectra of (a)  $\text{Ni}_4\text{P}_2$ , (b)  $\text{Ni}_9\text{P}_3$ , ~ 2 wt % in KBr

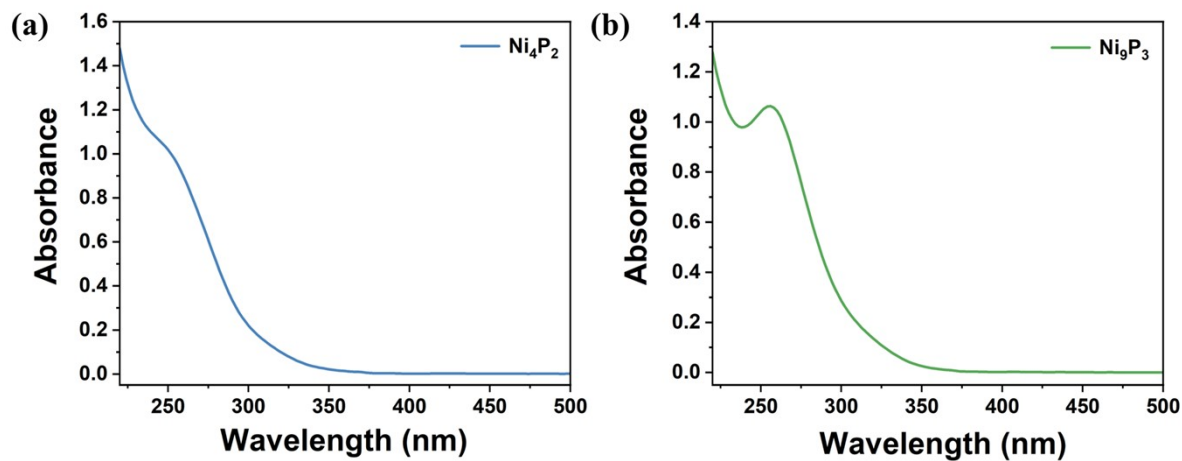

**Fig. S7** UV-vis spectra of  $\text{Ni}_9\text{P}_3$  and  $\text{Ni}_4\text{P}_2$  catalyst at the same concentration (0.0016 mM)

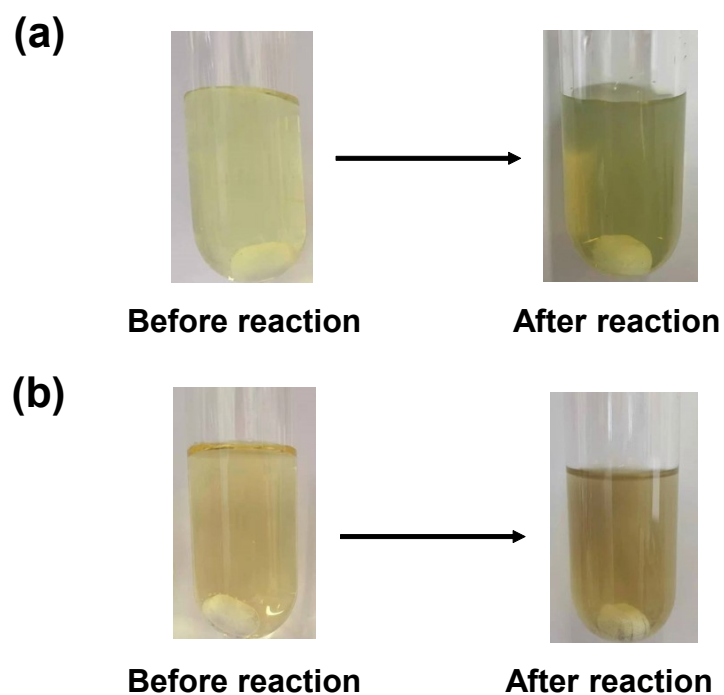

**Fig. S8** Digital photos of the reaction solution before and after photocatalysis using (a) 0.1 mM of  $\text{Ni}_9\text{P}_3$  catalyst and (b) 0.9 mM of  $\text{NiCl}_2$ . Reaction conditions: 10 mM of PP-one (**1a**), 1  $\mu\text{M}$  of CdS-MPA QDs, 10 mL of iso-propanol/ $\text{H}_2\text{O}$  (3/2), blue LED (450 nm), 8h, Ar/ $\text{CH}_4$  (4/1) atmosphere

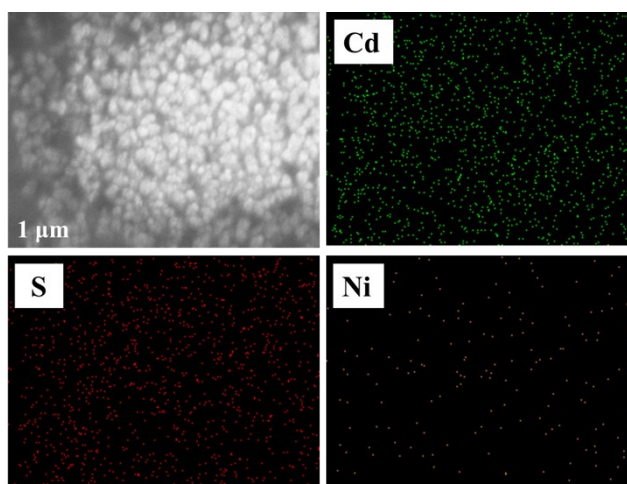

**Fig. S9** SEM and corresponding elemental mapping images of isolated CdS-MPA QDs from NiCl<sub>2</sub>-catalyzed post-reaction solution. Reaction conditions: 10 mM of PP-one (**1a**), 1 μM of CdS-MPA QDs, 10 mL of iso-propanol/H<sub>2</sub>O (3/2), blue LED (450 nm), 8h, Ar/CH<sub>4</sub> (4/1) atmosphere

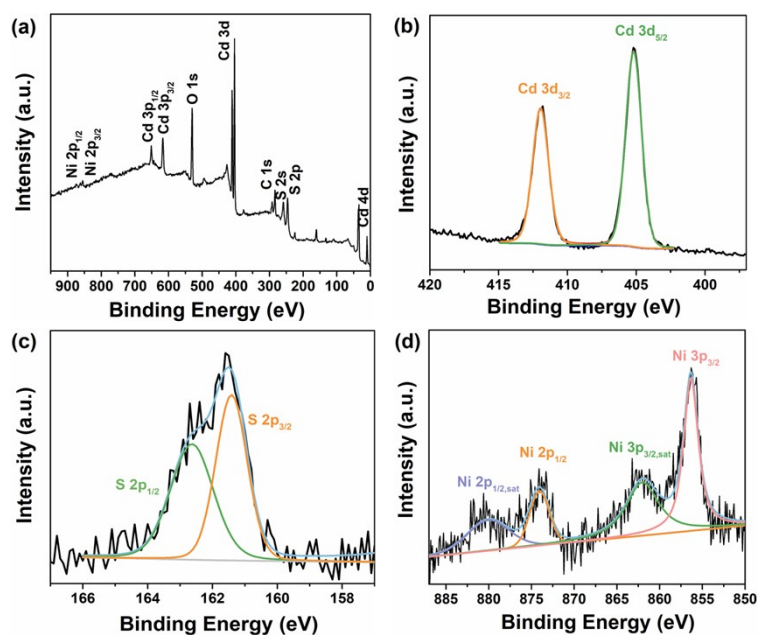

**Fig. S10** High resolution XPS spectra of (a) Full XPS spectrum, (b) Cd 3d, (c) S 2p, and (d) Ni 2p signals of isolated CdS-MPA QDs from NiCl<sub>2</sub>-catalyzed post-reaction solution after photocatalysis for 8 h



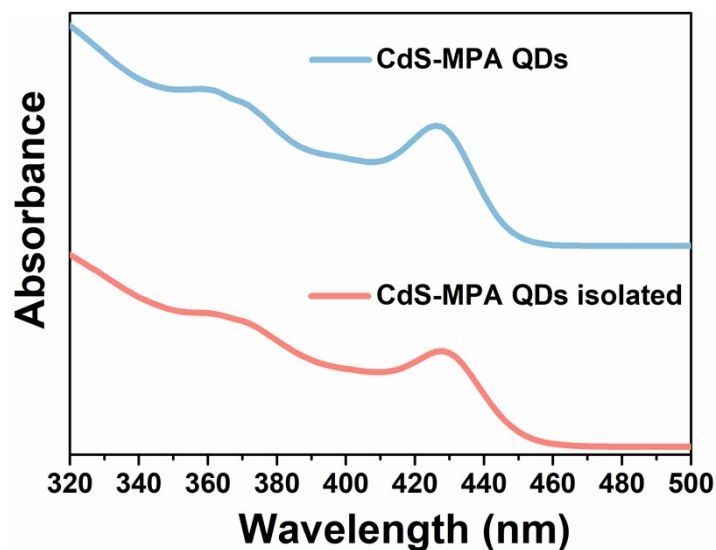

**Fig. S11** UV-vis spectra of CdS-MPA QDs before and after photocatalysis

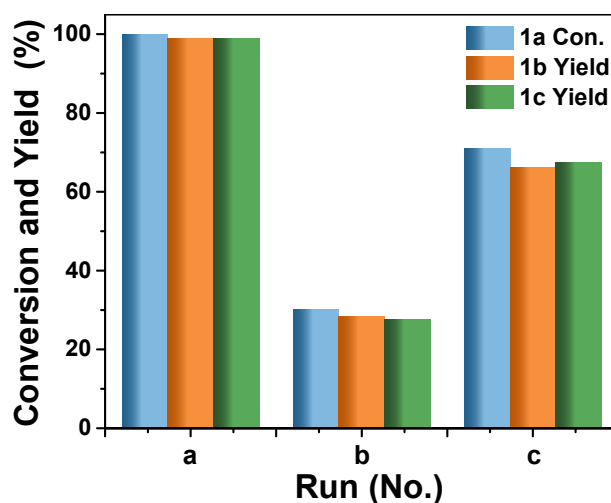

**Fig. S12** Photocatalytic hydrogenolysis of PP-one. (a) the first run using fresh CdS-MPA QDs and  $\text{Ni}_9\text{P}_3$  catalyst, (b) the second run using isolated CdS-MPA QDs and no fresh  $\text{Ni}_9\text{P}_3$  catalyst was added in this cycle, (c) the third run using isolated CdS-MPA QDs and fresh  $\text{Ni}_9\text{P}_3$  catalyst. Standard reaction conditions: 10 mM of PP-one (**1a**), 1  $\mu\text{M}$  of CdS-MPA QDs, 0.1 mM of  $\text{Ni}_9\text{P}_3$  catalyst, 10mL of iso-propanol/ $\text{H}_2\text{O}$  (3/2), blue LED (450 nm), 8h, Ar/ $\text{CH}_4$  (4/1) atmosphere

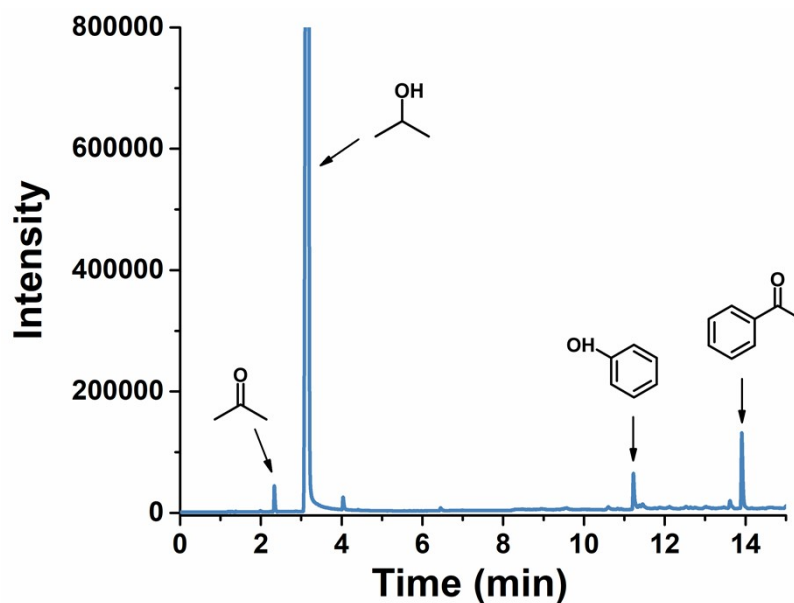

**Fig. S13** Gas chromatography (GC) from the photocatalytic hydrogenolysis of PP-one. Reaction conditions: 10 mM of PP-one (1a), 1  $\mu$ M of CdS-MPA QDs, 0.1 mM of  $\text{Ni}_9\text{P}_3$ , 10mL of iso-propanol/ $\text{H}_2\text{O}$  (3/2), blue LED (450 nm), 8h, Ar/ $\text{CH}_4$  (4/1) atmosphere

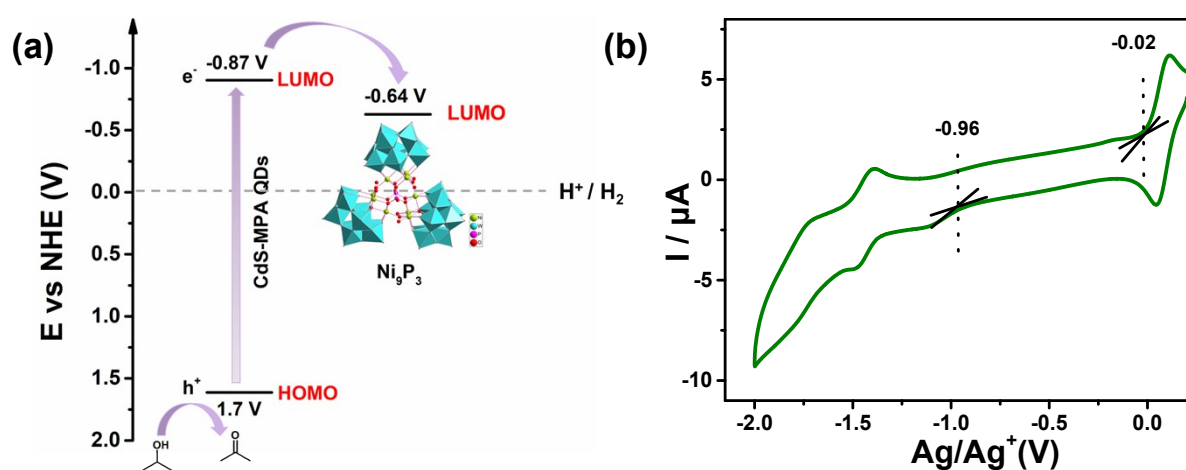

**Fig. S14** (a) Schematic energy level diagram for photocatalytic hydrogenolysis of PP-one; (b) Cyclic voltammogram of  $\text{Ni}_9\text{P}_3$  (0.1 mM) in 0.1 M TBAPF<sub>6</sub> and 0.01M AgNO<sub>3</sub> acetonitrile solution using glassy carbon working electrode, Ag/Ag<sup>+</sup> reference electrode, and Pt silk counter electrode; Scan rate: 100 mV/s. The measured potential was expressed by converting to normal hydrogen electrode (NHE)

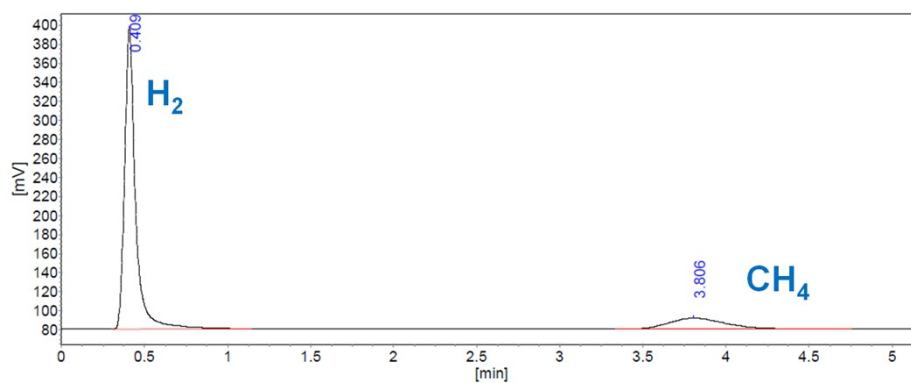

**Analysis result table**

| Entry | Retention time (min) | Peak height (uV) | Peak area (uV*s) | Area percentage % |
|-------|----------------------|------------------|------------------|-------------------|
| 1     | 0.409                | 315679           | 1438574          | 83.0850           |
| 2     | 3.806                | 11702            | 292874           | 16.9150           |

**Fig. S15** Gas chromatography (GC) trace of hydrogen gas produced from the photocatalytic hydrogenolysis of PP-one. Reaction conditions: 10 mM of PP-one (**1a**), 1  $\mu$ M of CdS-MPA QDs, 0.1 mM of  $\text{Ni}_9\text{P}_3$ , 10mL of iso-propanol/ $\text{H}_2\text{O}$  (3/2), blue LED (450 nm), 8h, Ar/ $\text{CH}_4$  (4/1) atmosphere

**Table S1 Semiconductor Photocatalysts for Lignin Conversion**

| Entry | Catalyst                                                             | Heterogeneous/Homogeneous | Substrate concentration | Reaction time | Product                                            | Conv. [%] | Yield [%]               | Ref.      |
|-------|----------------------------------------------------------------------|---------------------------|-------------------------|---------------|----------------------------------------------------|-----------|-------------------------|-----------|
| 1     | CdS-MPA QDs (1 $\mu$ M) + Ni <sub>9</sub> P <sub>3</sub> (0.1 mM)    | Homogeneous               | 10 mM                   | 8 h           | A: phenol, B: acetophenone                         | 99        | A: 99<br>B: 99          | This work |
| 2     | ZnIn <sub>2</sub> S <sub>4</sub> (5 mg)                              | Heterogeneous             | 100 mM                  | 4 h           | A: phenol, B: acetophenone, C: benzyl phenyl ether | 99        | A: 83<br>B: 90<br>C: 6  | 4         |
| 3     | Ni/CdS (20 mg)                                                       | Heterogeneous             | 5 mM                    | 8 h           | A: phenol, B: acetophenone                         | 100       | A: 99<br>B: 99          | 9         |
| 4     | CdS (10mg)                                                           | Heterogeneous             | 20 mM                   | 3 h           | A: phenol, B: acetophenone                         | 99        | A: 93<br>B: 91          | 37        |
| 5     | Pb/ZnIn <sub>2</sub> S <sub>4</sub> (10 mg), TiO <sub>2</sub> (5 mg) | Heterogeneous             | 133 mM                  | 33 h          | A: phenol, B: acetophenone                         | 94        | A: 94<br>B: 76          | 50        |
| 6     | Zn <sub>4</sub> In <sub>2</sub> S <sub>7</sub> (10 mg)               | Heterogeneous             | 20 mM                   | 4 h           | A: phenol, B: acetophenone, C: benzyl phenyl ether | 99        | A: 82<br>B: 86<br>C: 10 | 51        |
| 7     | Mesoporous g-C <sub>3</sub> N <sub>4</sub> (10 mg)                   | Heterogeneous             | 50 mM                   | 10 h          | A: acetophenone, B: benzaldehyde, C: benzoic acid  | 96        | A: 51<br>B: 30<br>C: 21 | 54        |
| 8     | In <sub>2</sub> S <sub>3</sub> (20 mg)                               | Heterogeneous             | 0.16 mM                 | 8.384 min     | C: 2-methoxy-4-hydroxybenzaldehyde                 | N.A.      | N.A.                    | 55        |
| 9     | Zn <sub>4</sub> In <sub>2</sub> S <sub>7</sub> (10mg)                | Heterogeneous             | 20 mM                   | 2 h           | A: phenol, B: acetophenone, C: benzyl phenyl ether | 93        | A: 70<br>B: 51<br>C: 17 | 56        |
| 10    | Cd <sub>x</sub> Zn <sub>1-x</sub> S (10 mg)                          | Heterogeneous             | 20 mM                   | 2 h           | A: phenol, B: acetophenone                         | 93        | A: 85<br>B: 36          | 57        |
| 11    | Ligand-controlled CdS QDs (15 mg)                                    | Heterogeneous             | Native lignin           | 8 h           | Aromatic monomers                                  | 27        | N.A.                    | 58        |

**Table S2 Screening of Reaction Conditions for Photocatalytic Hydrogenolysis of PP-one<sup>a</sup>**

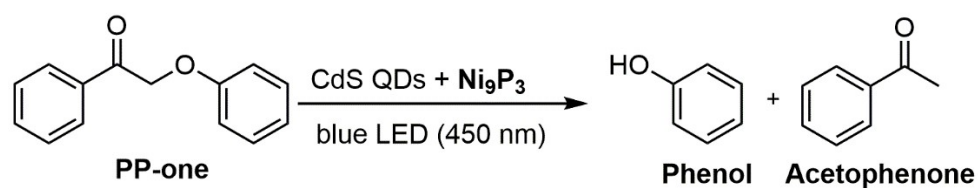

| Entry          | Conv. (%) | Product Yield (%) |              | H <sub>2</sub> (μmol) | Acetone (μmol) |
|----------------|-----------|-------------------|--------------|-----------------------|----------------|
|                |           | Phenol            | Acetophenone |                       |                |
| 1              | 99.3      | 99.3              | 98.8         | 142.3                 | 205.3          |
| 2 <sup>b</sup> | 0         | 0                 | 0            | 0                     | 78.4           |
| 3 <sup>c</sup> | 48.5      | 48.4              | 43.1         | 17.9                  | 76.7           |
| 4 <sup>d</sup> | 43.5      | 42.8              | 21.8         | 405.2                 | 276.3          |

<sup>a</sup> Reaction conditions: 10mM of 2-phenoxy-1-phenylethan-1-one, 1 μM of CdS-MPA QDs, 0.1 mM of Ni<sub>9</sub>P<sub>3</sub>, 10 mL of isopropanol/H<sub>2</sub>O (3/2), blue LED (450 nm), Ar/CH<sub>4</sub> (4/1) atmosphere, 8 h. <sup>b</sup> with 10mM K<sub>2</sub>S<sub>2</sub>O<sub>8</sub>. <sup>c</sup> with 10mM Na<sub>2</sub>C<sub>2</sub>O<sub>4</sub>. <sup>d</sup> with 2 wt % Pt

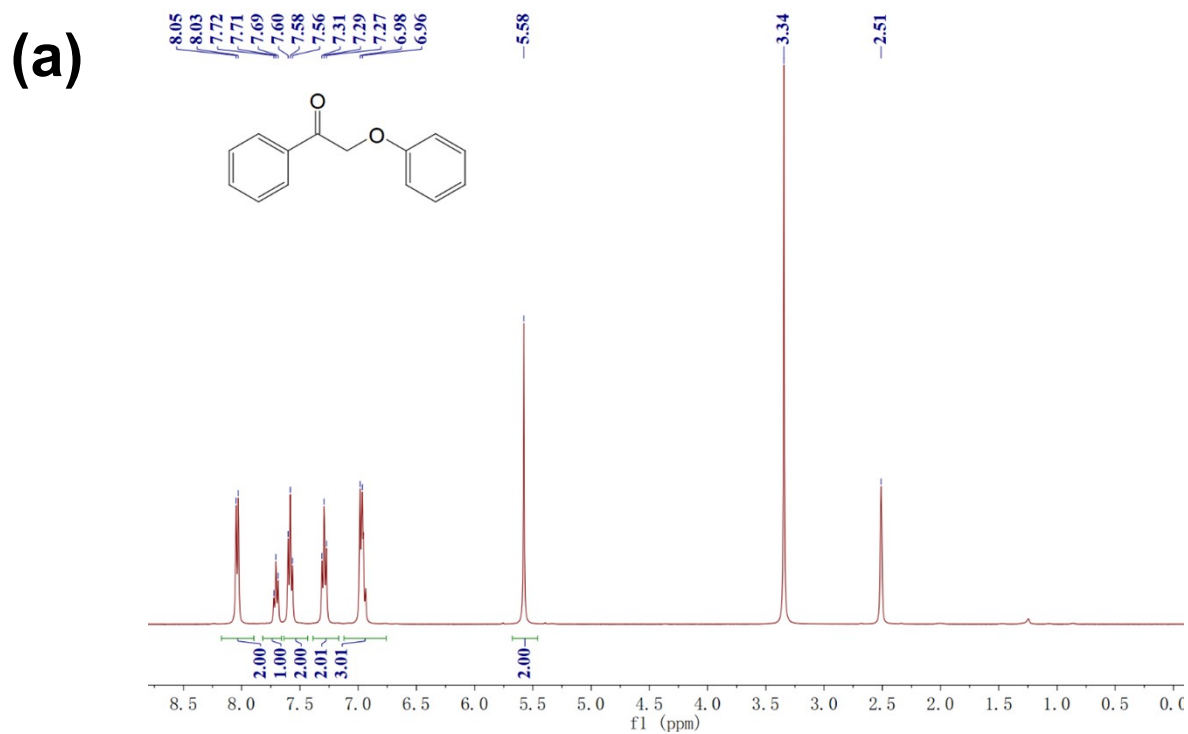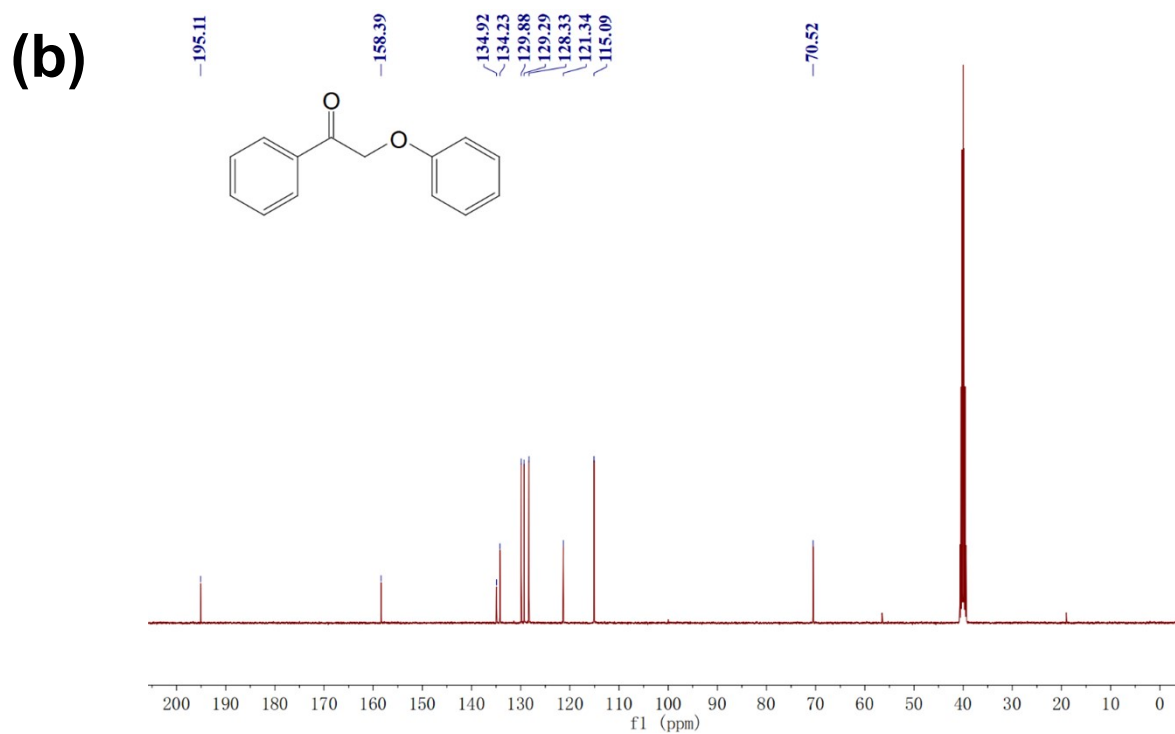

**Fig. S16** (a)  $^1\text{H}$  NMR spectra and (b)  $^{13}\text{C}$  NMR spectra of compound 2-phenoxy-1-phenylethan-1-one (**1a**)

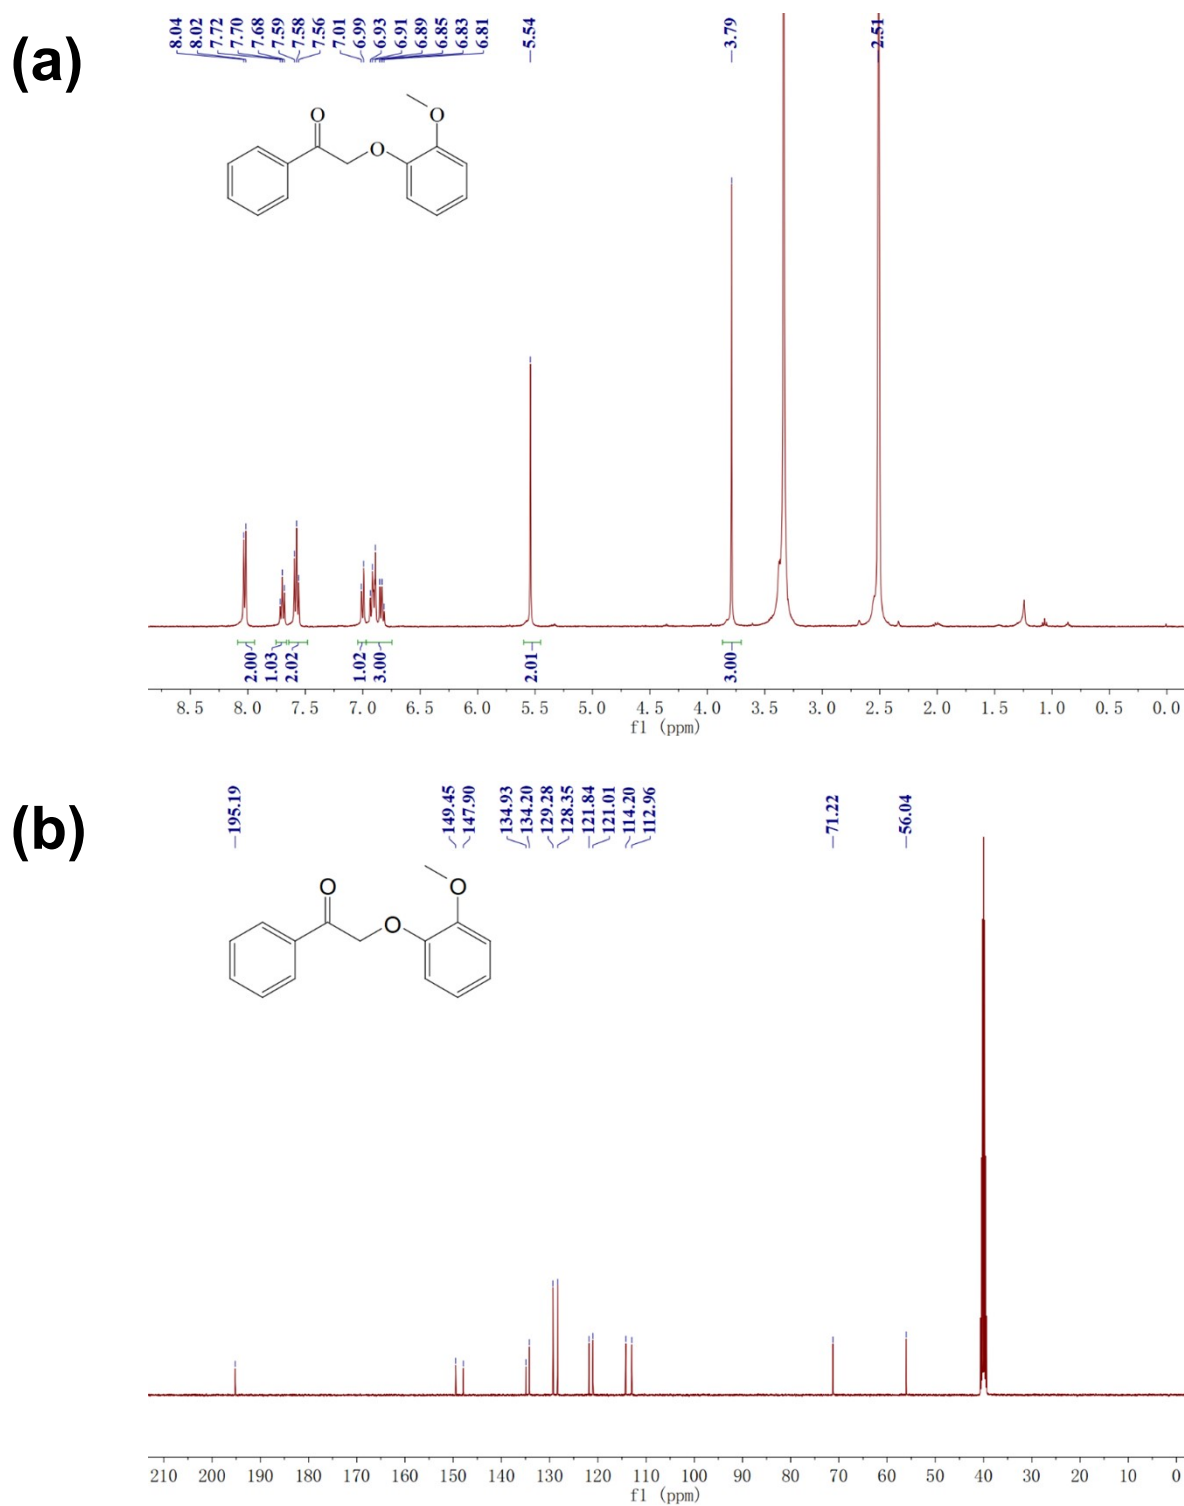

**Fig. S17** (a)  $^1\text{H}$  NMR spectra and (b)  $^{13}\text{C}$  NMR spectra of compound 2-(2-methoxyphenoxy)-1-phenylethan-1-on (**2a**)

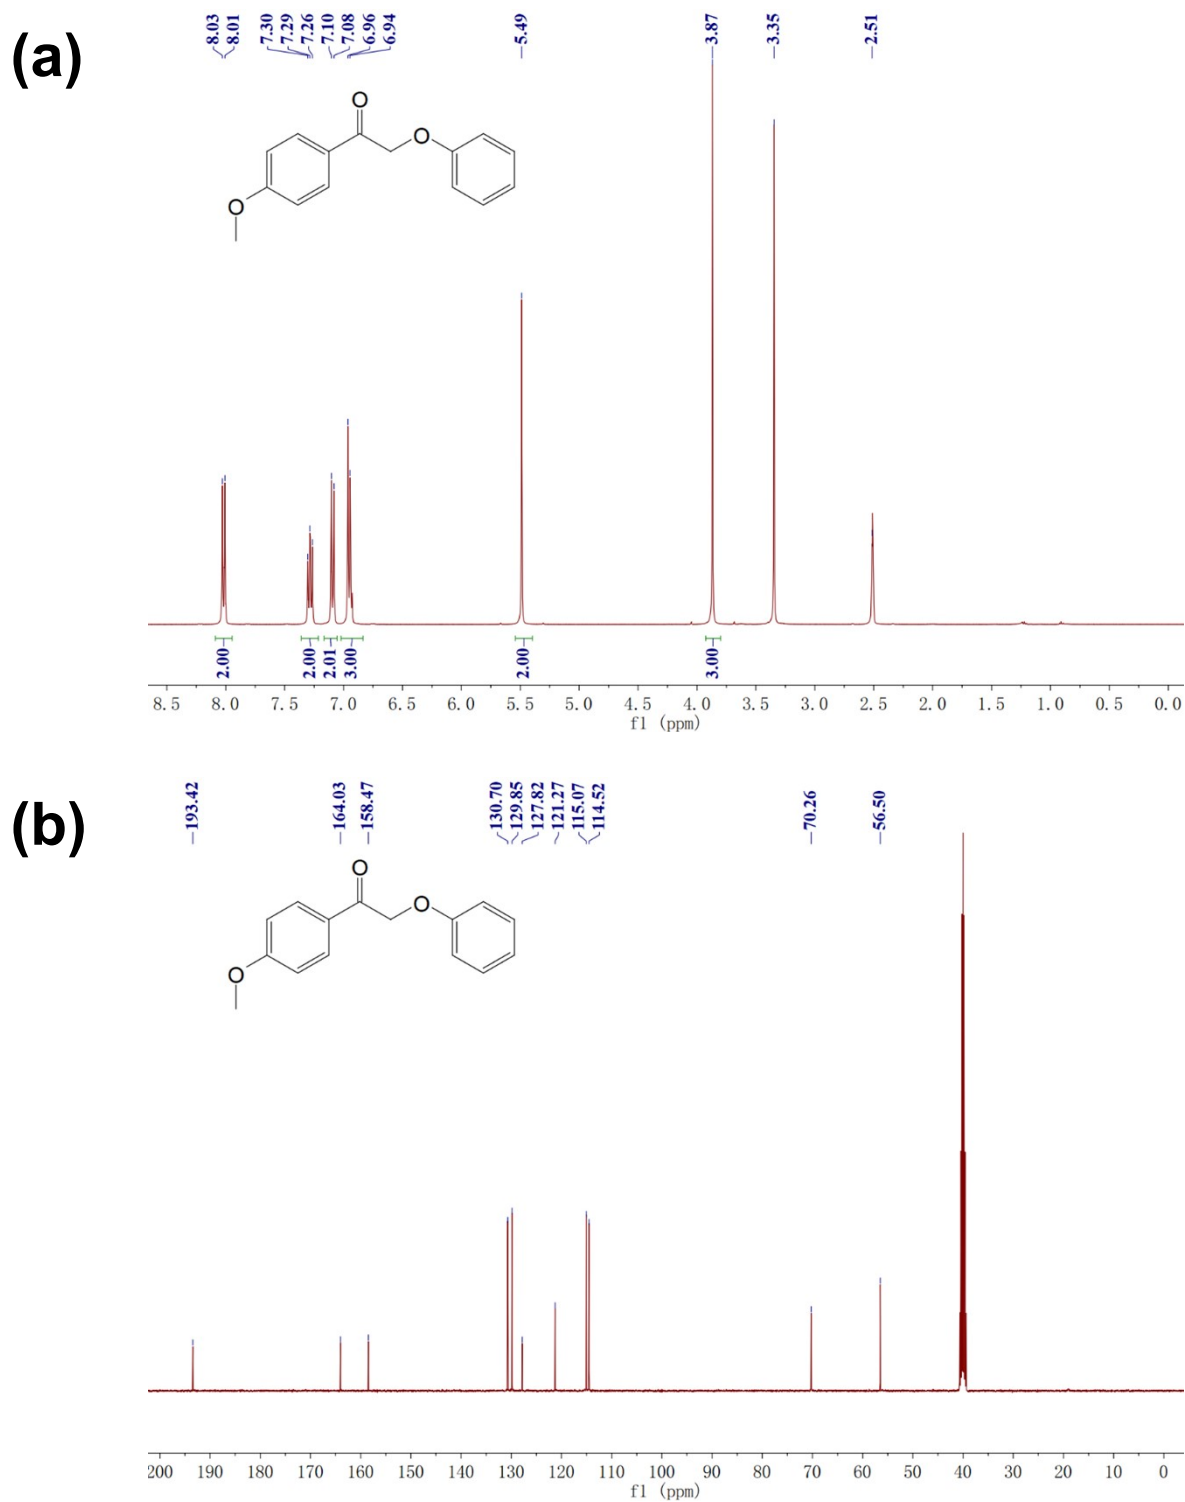



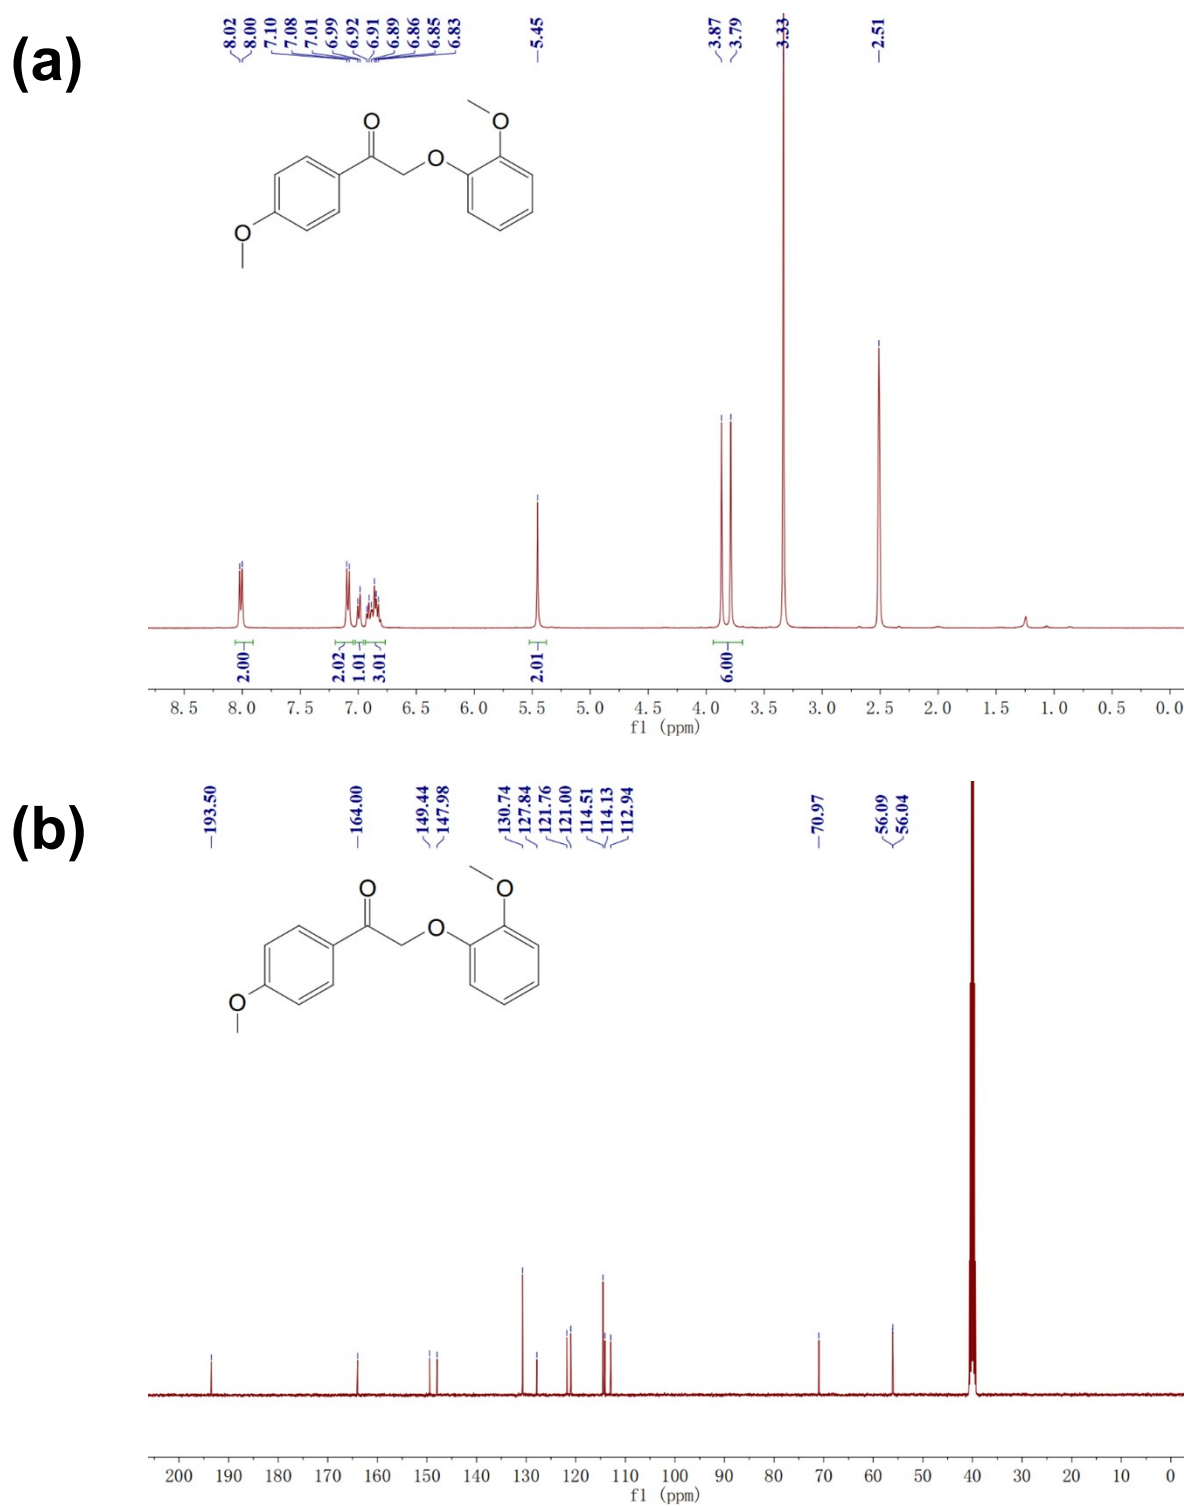

**Fig. S19** (a)  $^1\text{H}$  NMR spectra and (b)  $^{13}\text{C}$  NMR spectra of compound 2-(2-methoxyphenoxy)-1-(4-methoxyphenyl)ethan-1-one (**4a**)

(a)

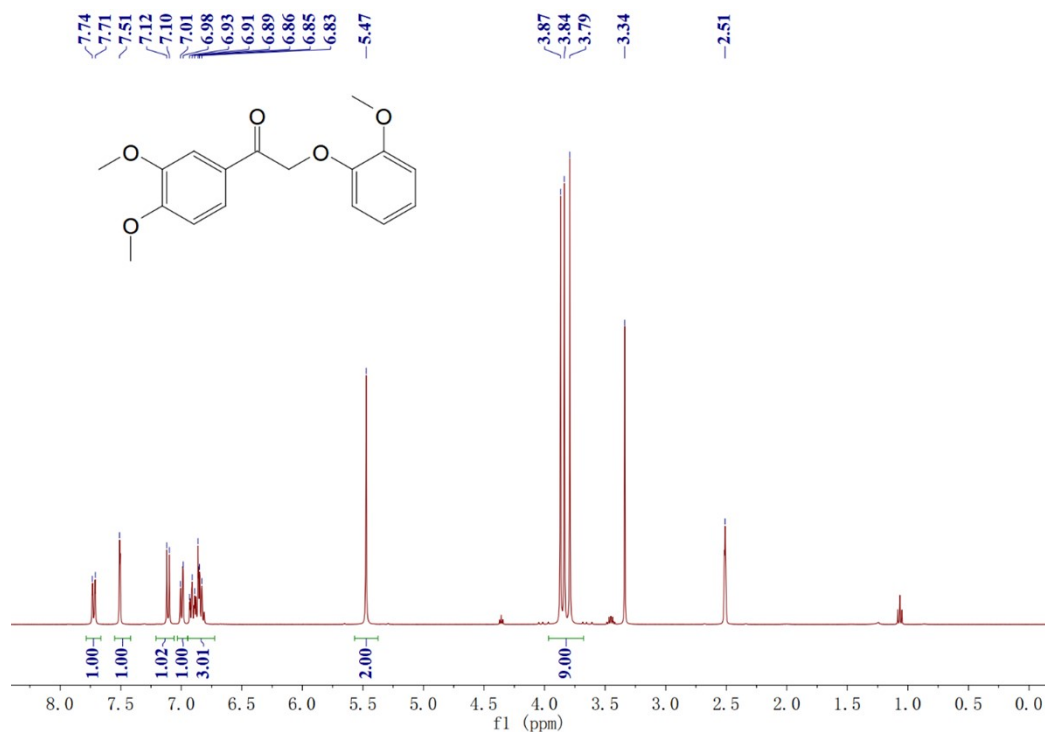

(b)

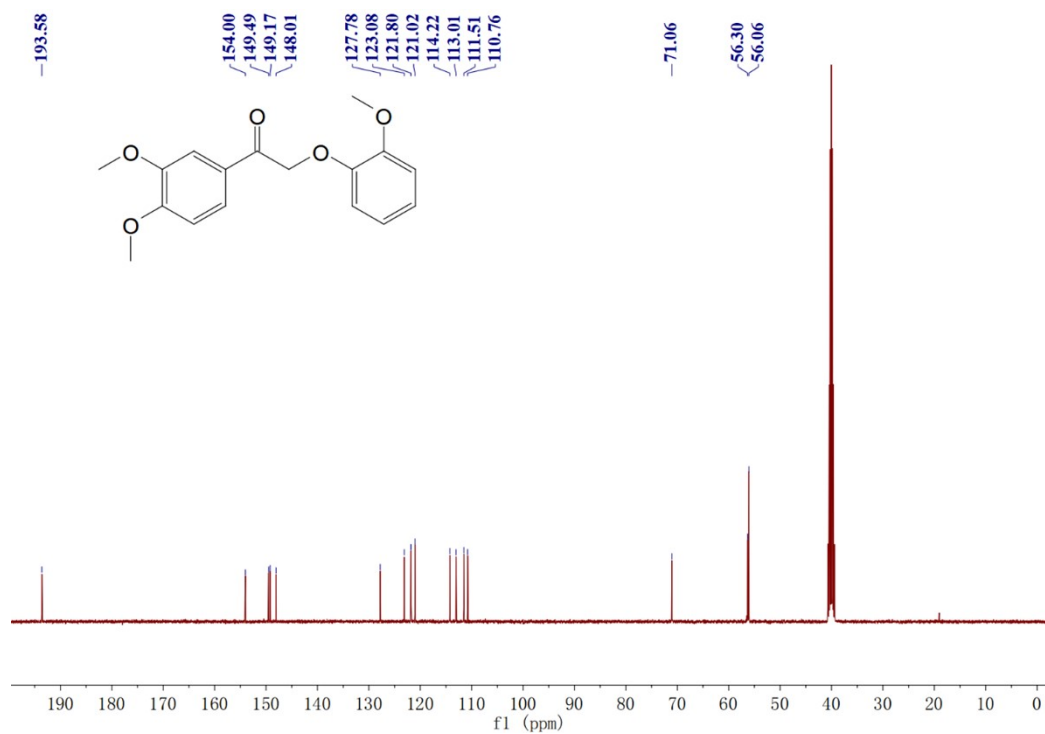

**Fig. S20** (a) <sup>1</sup>H NMR spectra and (b) <sup>13</sup>C NMR spectra of compound 1-(3,4-dimethoxyphenyl)-2-(2-methoxyphenoxy)ethan-1-one (**5a**)

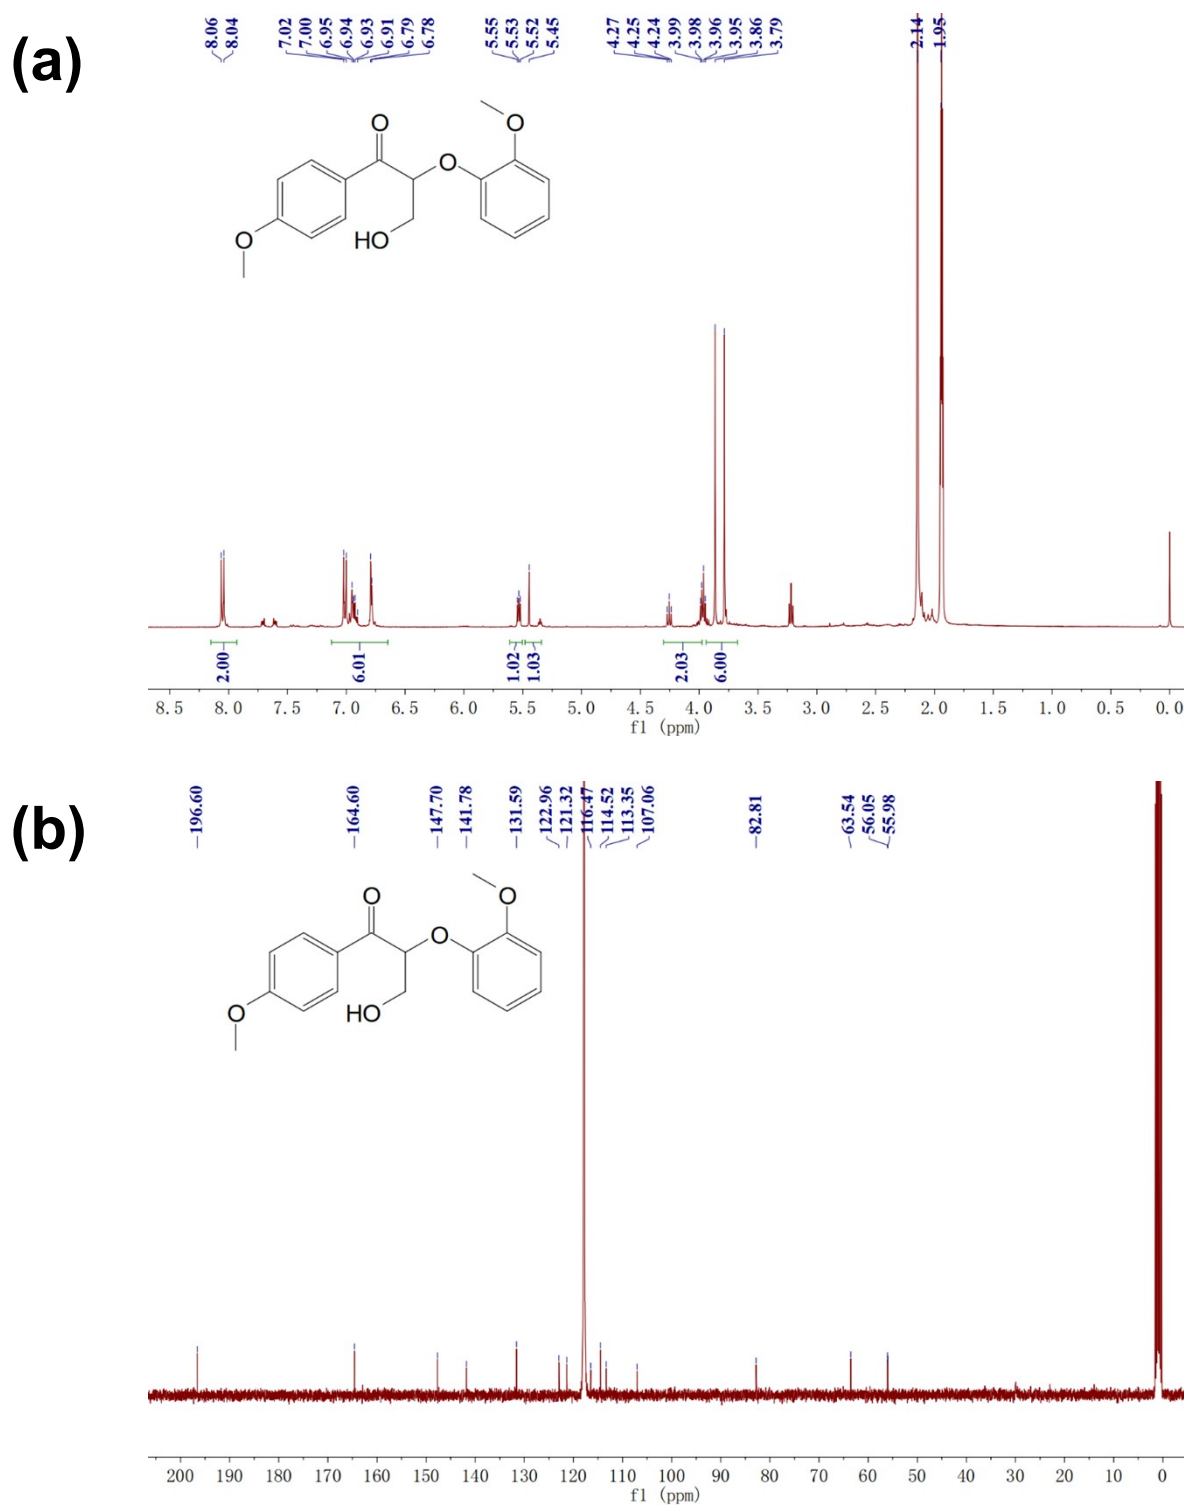

**Fig. S21** (a)  $^1\text{H}$  NMR spectra and (b)  $^{13}\text{C}$  NMR spectra of compound 3-hydroxy-2-(2-methoxyphenoxy)-1-(4-methoxyphenyl)propan-1-one (**6a**)

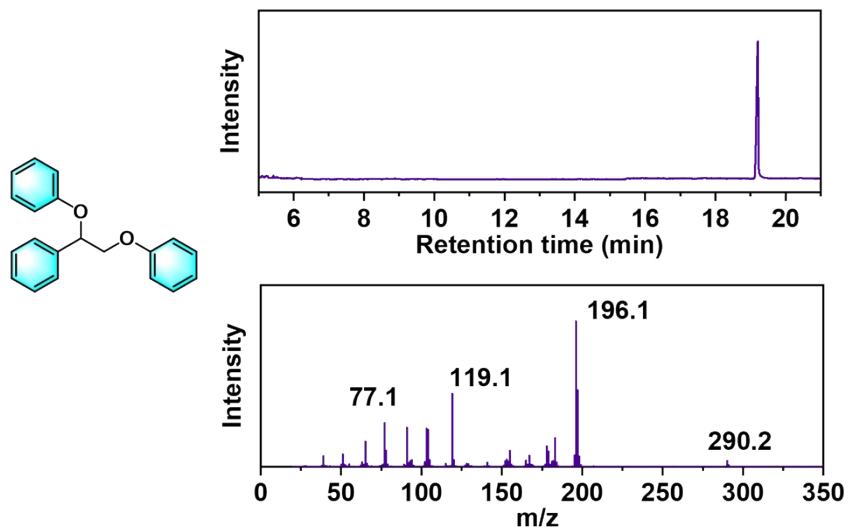

**Fig. S22** The structure and GC-MS spectra of compound ((1-phenylethane-1,2-diyl)bis(oxy))dibenzene (**7a**)
